# Supplementary material for: Tracing the Origin of the HSC Hierarchy Reveals an SCF-Dependent, IL-3-Independent CD43− Embryonic Precursor
Source: PubMed Central journal article supplement — Stem Cell Reports. 2014 Aug 28;3(3):489–501. doi: 10.1016/j.stemcr.2014.07.009 (PMC4266012; doi:10.1016/j.stemcr.2014.07.009), 2014-08-28
Supplement: mmc1.pdf [file mmc1.pdf]

**Stem Cell Reports, Volume 3**

**Supplemental Information**

**Tracing the Origin of the HSC Hierarchy Reveals an SCF-  
Dependent, IL-3-Independent CD43<sup>-</sup> Embryonic Precursor**

**Stanislav Rybtsov, Antoniana Batsivari, Kateryna Bilotkach, Daria Paruzina, Jordi Senserrich, Oleg Nerushev, and Alexander Medvinsky**

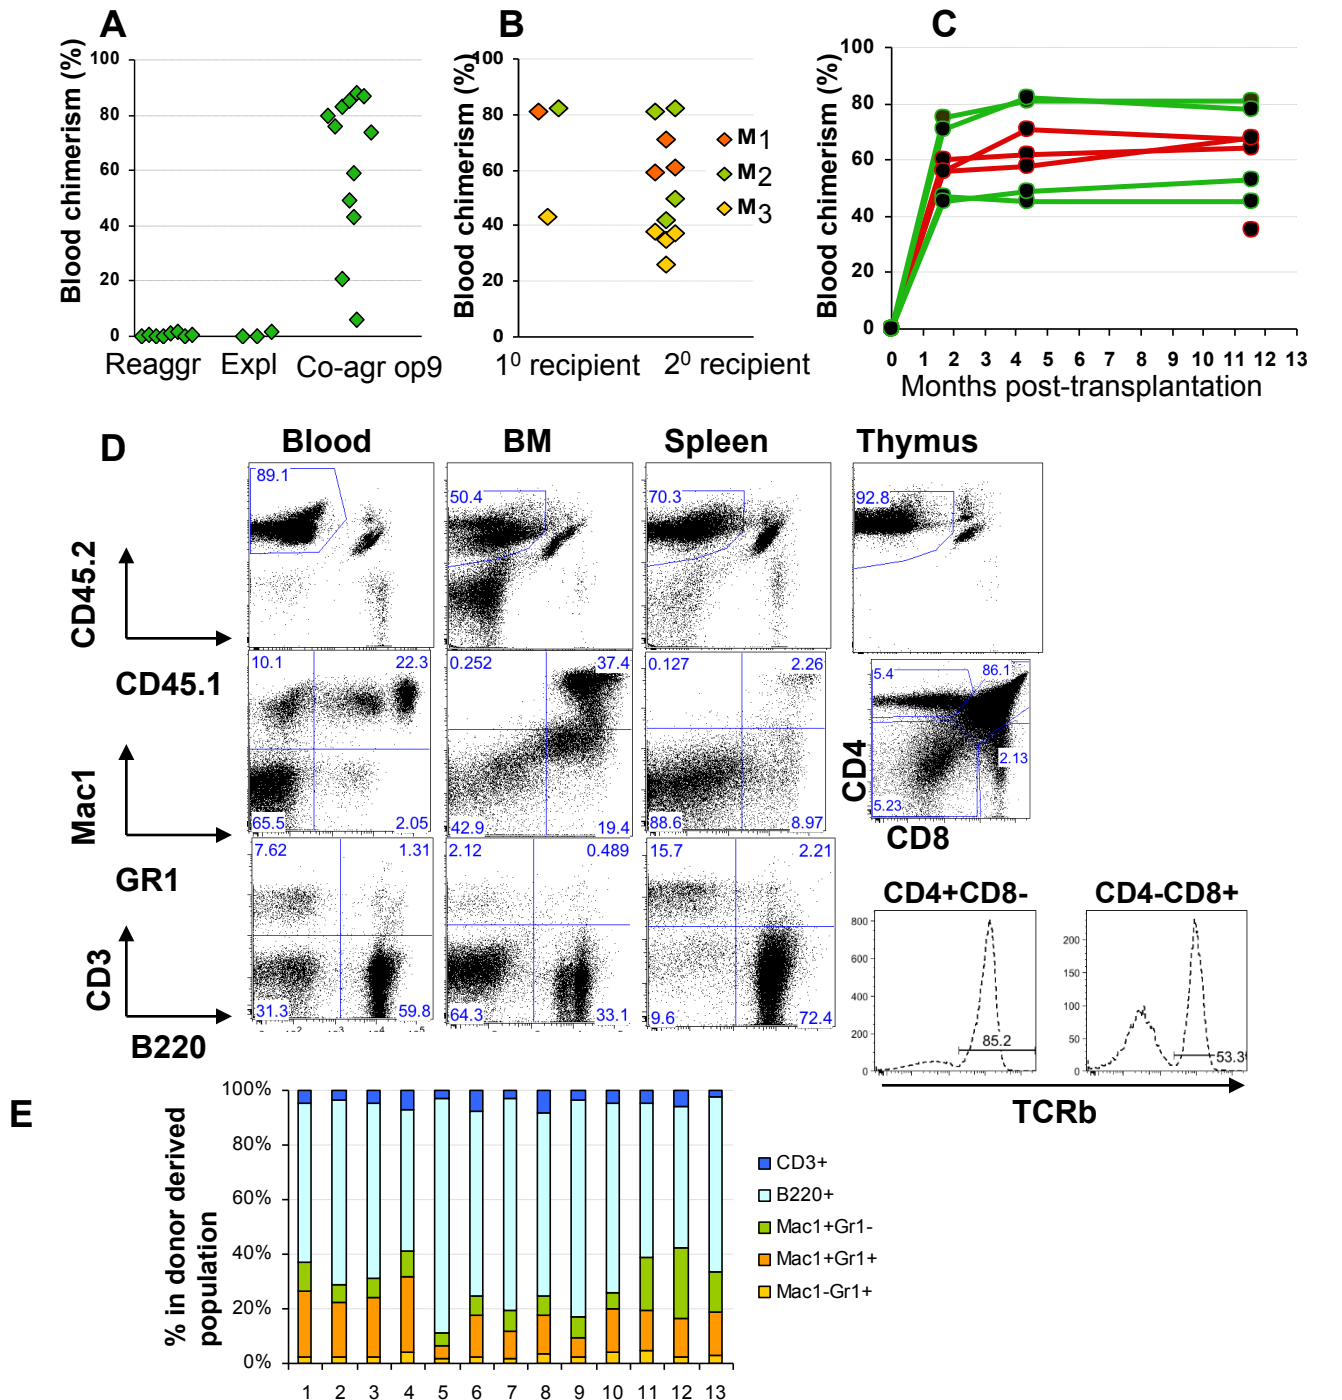

**Suppl. Fig. 1 Long-term multi-lineage haematopoietic repopulation with definitive HSCs matured from pro-HSCs.**

**A.** Maturation of pro-HSCs requires co-culture with OP9. Note that reaggregation of the caudal part on itself or explant cultures have not generated HSCs (All transplantations were performed with 1 e.e./recipient).

**B.** Donor-derived engraftment in secondary recipients after 6 months (each secondary recipient received  $10^7$  nucleated bone marrow cells from primary recipients);

**C.** Stable donor-derived haematopoietic repopulation of secondary recipients observed over 12 months' period.

**D.** Multi-lineage long-term repopulation in blood, bone marrow, spleen and thymus of primary recipients (6 months post-transplantation). Donor-derived TCR $\beta$ <sup>+</sup> cells are detectable in the thymus.

**E.** Donor derived myeloid and lymphoid contribution in blood of individual recipients (shown by individual bars). Each experiment was repeated at least twice.

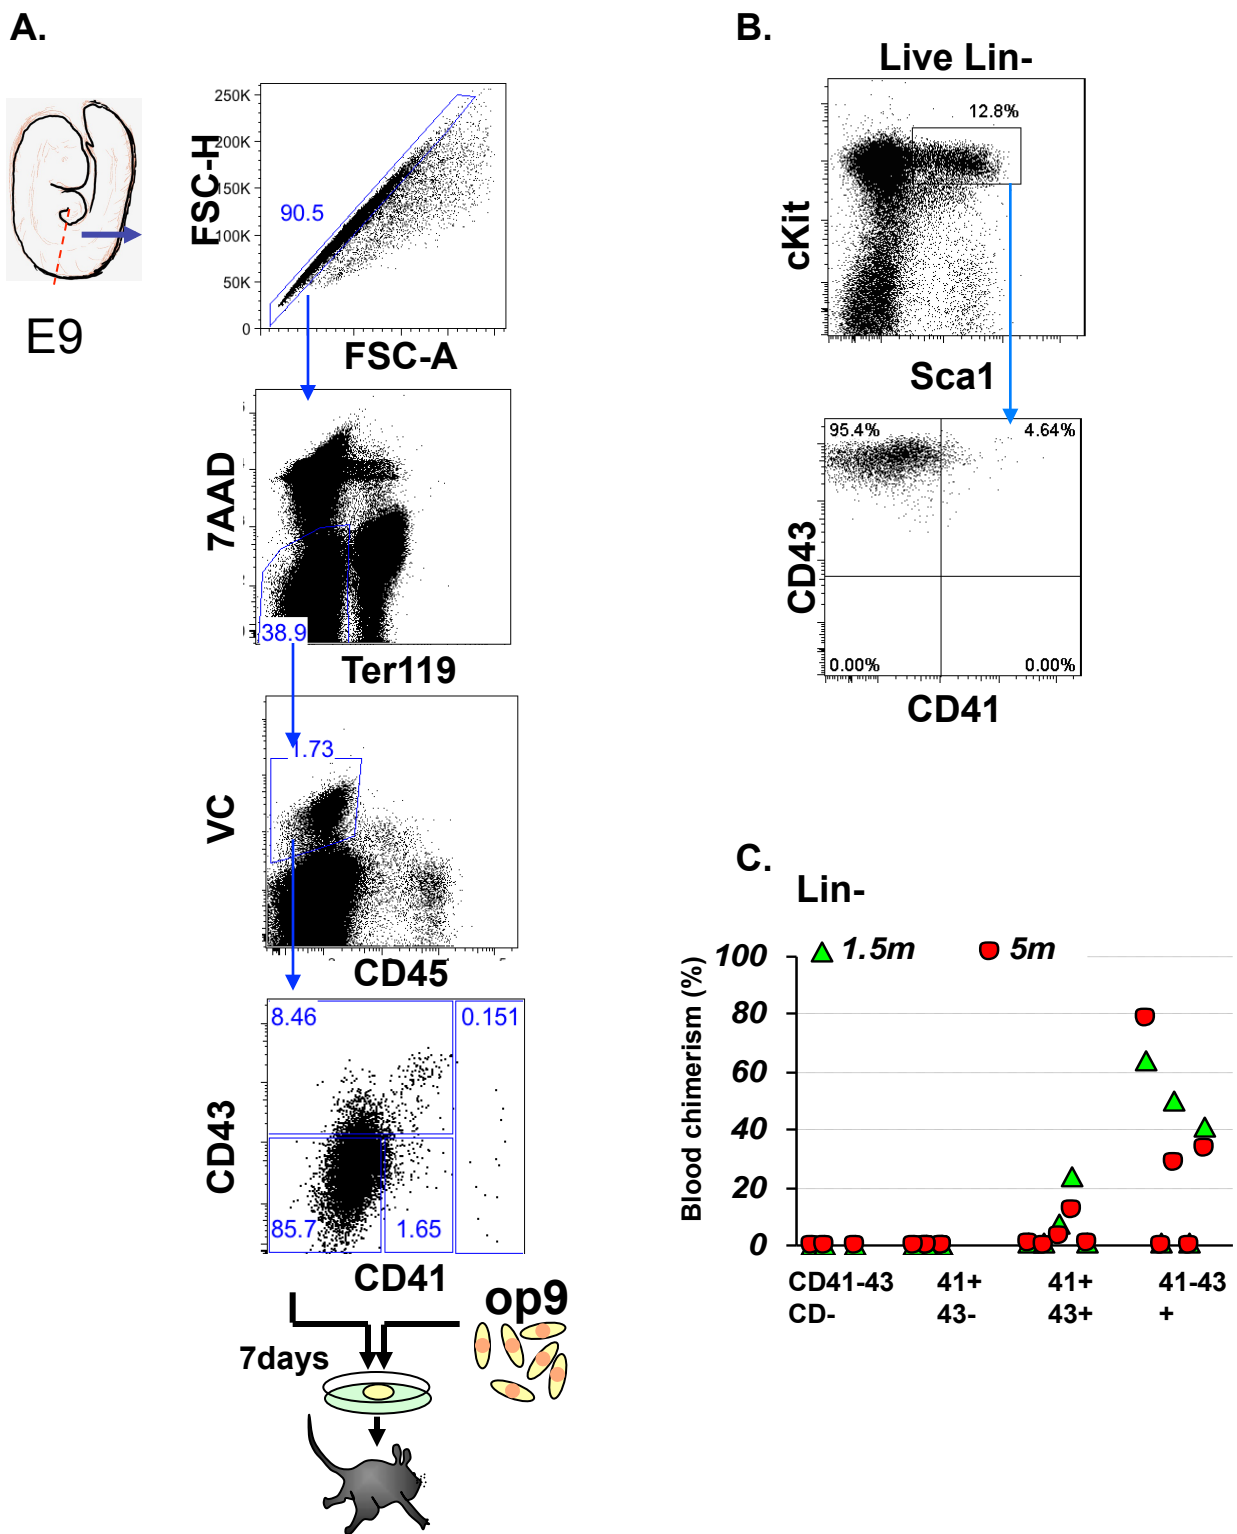

**Suppl Fig. 2. Gating strategy for sorting pro-HSCs and phenotype of adult HSC.**

**A.** Gating strategy for isolation of pro-HSCs from E9.5 embryos followed by co-culture with OP9 cells and transplantation into adult irradiated recipients (cell duplets, erythroid cells and dead cells excluded).

**B.** High expression levels of CD43 is observed in the adult bone marrow LSK population.

**C.** Adult bone marrow HSCs reside mainly within single CD41-CD43+Lin- fraction. Some HSC with low level repopulation potential reside within the CD41+CD43+ fraction. Other cell fractions are devoid of HSC activity. Green triangles represent short-term repopulation; red circles represent long-term repopulation; m, months (two independent experiments).

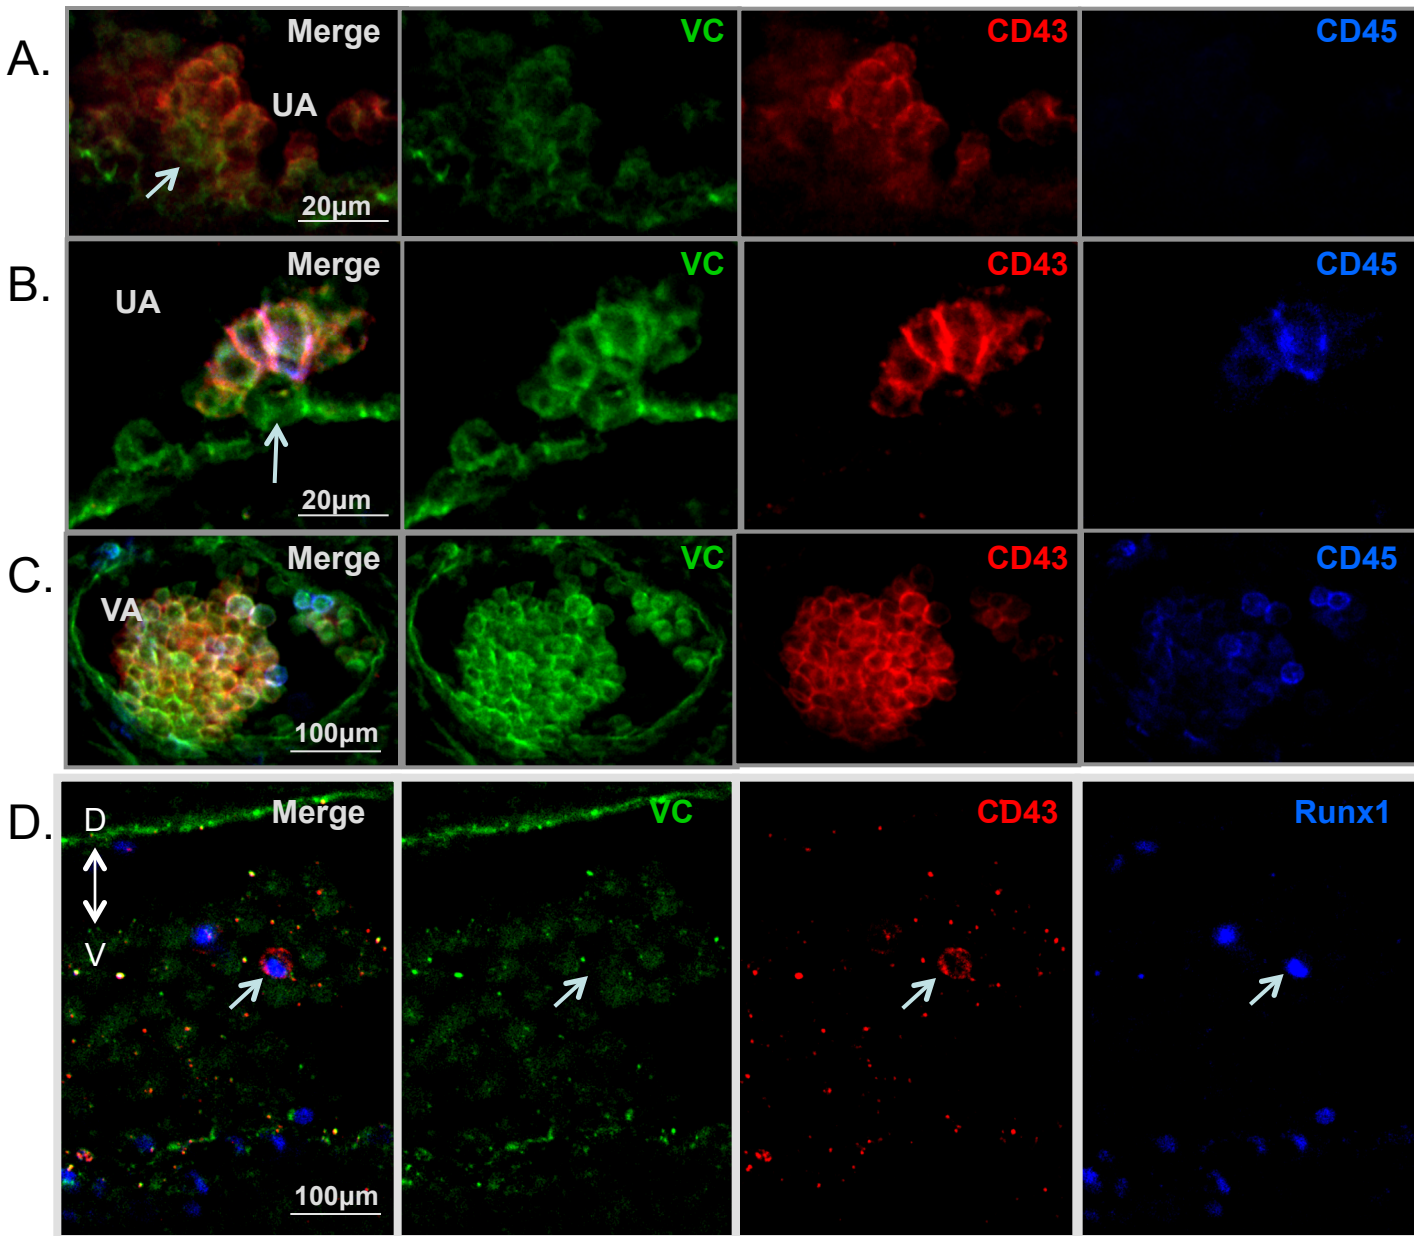

**Suppl. Fig. 3. Confocal analysis of markers in cells clusters inside the the vitelline artery (VA) and umbilical cord (UC); (whole mount preparations).**

**A.** VE-cad<sup>+</sup>CD43<sup>+</sup>CD45<sup>-</sup> haematopoietic cluster inside a E10.5 umbilical artery.

**B.** Small haematopoietic cluster in E10.5 umbilical artery suggests gradual upregulation of CD43 followed by CD45 expression. Note that all cells are VE-cad<sup>+</sup>, of which many more apically located are CD43<sup>+</sup>, of which some express CD45<sup>+</sup> (follow images from left to right).

**C.** Large haematopoietic cluster adhered to the luminal surface of the E10.5 vitelline artery (transverse section, Z-stuck derived).

**D.** Solitary CD43<sup>+</sup>RUNX1<sup>+</sup> haematopoietic cells not expressing VE-cadherin can be observed in circulation of the E9.5 dorsal aorta.

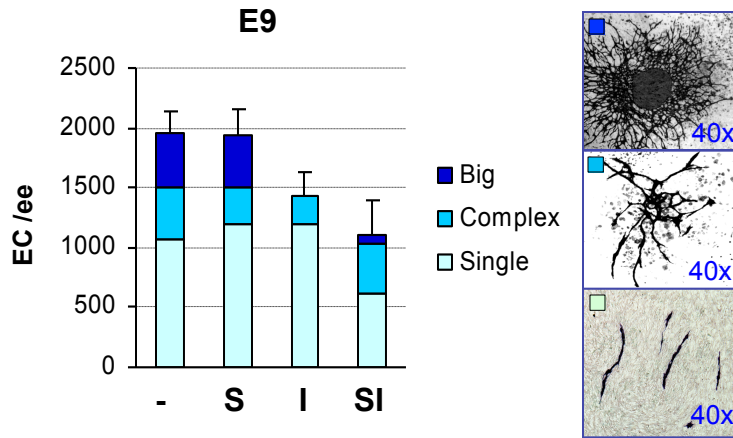

**Suppl. Fig. 4. CFU- En (Colony-Forming Unit- Endothelial) assay.**

While SCF (**S**) does not affect numbers and complexity of endothelial colonies, IL3 (**I**) inhibits formation and complexity of colonies (colony types are colour coded). (Three independent experiments).
